# Supplementary material
Source: Springer Nature journal article supplement (https://www.springermedizin.de/resource/supplementary/12884_2012_705_MOESM1_ESM.pdf/9458522)
Supplement: MOESM1 [file 9458522]

Consecutive women presenting in labour at  
ORH NHS Trust May to October 2006  
N = 3,117

Multiple births N = 23

- Twins N = 22
- Triplets N = 1

Emergency Caesarean  
N = 319

- No vaginal attempt N = 278
- Vaginal attempt = 41

Birth before arrival N = 20

Unknown N = 1

Women with a planned singleton vaginal delivery N = 2,754

Planned hospital  
birth at start of  
labour  
N = 2,355

Planned FMU  
birth at start of  
labour  
N = 288

Planned  
homebirth at  
start of labour  
N = 111
